# Supplementary material for: Application of optical tweezer technology reveals that PfEBA and PfRH ligands, not PfMSP1, play a central role in Plasmodium falciparum merozoite-erythrocyte attachment
Source: PubMed Central journal article supplement (PMC11449297; doi:10.1371/journal.ppat.1012041), 2024-09-23
Supplement: ppat.1012041.s026.pdf [file ppat.1012041.s026.pdf]

## *Reviewer's Responses to Questions*

### **Part I - Summary**

*Please use this section to discuss strengths/weaknesses of study, novelty/significance, general execution and scholarship.*

*Reviewer #1: As stated in my initial review, this is an interesting study that needed essentially a lot of textual improvement, which the authors now provided.*

*Reviewer #2: (No Response)*

*Reviewer #3: (No Response)*

*Reviewer #4: No further comments.*

---

### **Part II – Major Issues: Key Experiments Required for Acceptance**

*Please use this section to detail the key new experiments or modifications of existing experiments that should be absolutely required to validate study conclusions.*

*Generally, there should be no more than 3 such required experiments or major modifications for a "Major Revision" recommendation. If more than 3 experiments are necessary to validate the study conclusions, then you are encouraged to recommend "Reject".*

*Reviewer #1: none*

*Reviewer #2: (No Response)*

*Reviewer #3: (No Response)*

*Reviewer #4: No further comments.*

---

### **Part III – Minor Issues: Editorial and Data Presentation Modifications**

*Please use this section for editorial suggestions as well as relatively minor modifications of existing data that would enhance clarity.*

*Reviewer #1: there are some small typos that can be easily corrected in proof stage*

The manuscript has been updated to try and correct any typos found.

*Reviewer #2: The authors have satisfactorily address most issues of concern except for Fig S13c. Fig S13c is mentioned 2x on page 18. There is no S13c so change to a or b.*

The incorrect figure number indicated has been corrected.

*Reviewer #3: (No Response)*

*Reviewer #4: No further comments.*
